# Supplementary material for: Mucosal Eosinophil Abundance in Non-Inflamed Colonic Tissue Is Associated with Response to Vedolizumab Induction Therapy in Inflammatory Bowel Disease
Source: MDPI journal article supplement (doi:10.3390/jcm11144141), 2022-07-16
Supplement: s1 [file s1]

## Supporting Information

**Supplementary Table S1.** *P*-values of Wilcoxon signed-rank tests comparing eotaxin-1 levels at week 0, week 6, and fold changes from week 0 to week 6, in matched pairs of UC and CD patients responding or not responding to vedolizumab induction therapy.

| Timepoint   | Ulcerative colitis | Crohn's Disease |
|-------------|--------------------|-----------------|
| Week 0      | 0.480              | 0.263           |
| Week 6      | 0.930              | 0.927           |
| Fold change | 0.416              | 0.353           |

**Supplementary Table S2.** Clinical response and remission during maintenance timepoints (weeks 14 and 52) were associated with week 0 and week 6 eotaxin-1 concentrations using a logistic regression incorporating baseline CDAI or Mayo scores, age, sex, and maintenance treatment as covariates. The table below shows the odds ratio associated with a 1 ng/ml increase in eotaxin-1, the 95% confidence interval of this estimate and *P*-values from a likelihood ratio test comparing models with and without the eotaxin-1 term.

| Eotaxin-1 | Outcome                    | Ulcerative Colitis    | Crohn's disease    |
|-----------|----------------------------|-----------------------|--------------------|
| Week 0    | Week 14 Clinical Response  | 1 [0.99-1] (0.615)    | 1 [0.99-1] (0.835) |
|           | Week 52 Clinical Response  | 0.9 [0-Inf] (1)       | 1.3 [0-Inf] (1)    |
|           | Week 52 Clinical Remission | 1 [0.97-1.1] (0.490)  | 1 [0-Inf] (1)      |
| Week 6    | Week 14 Clinical Response  | 1 [0.99-1] (0.938)    | 1 [0.99-1] (0.634) |
|           | Week 52 Clinical Response  | 1.2 [0-Inf] (1)       | 0.84 [0-Inf] (1)   |
|           | Week 52 Clinical Remission | 0.99 [0.96-1] (0.658) | 0.29 [0-Inf] (1)   |

## Supplementary Figure S1

### Patient selection

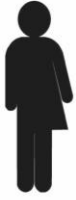

Discovery cohort  
84 IBD patients  
+  
GEMINI cohort  
100 IBD patients

### Counting Eosinophils

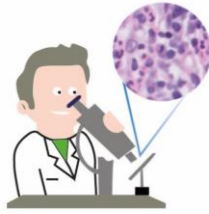

Eosinophil count in non  
inflamed colonic tissue of  
IBD patients

Discovery cohort  $n=24$

### Eotaxin-1 Levels

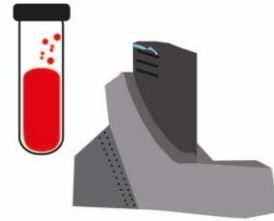

Eotaxin-1 levels in IBD  
patients

Discovery cohort  $n=64$   
GEMINI cohort  $n=100$

**Supplementary Figure S1.** Overview of the study design.

### Supplementary Figure S2

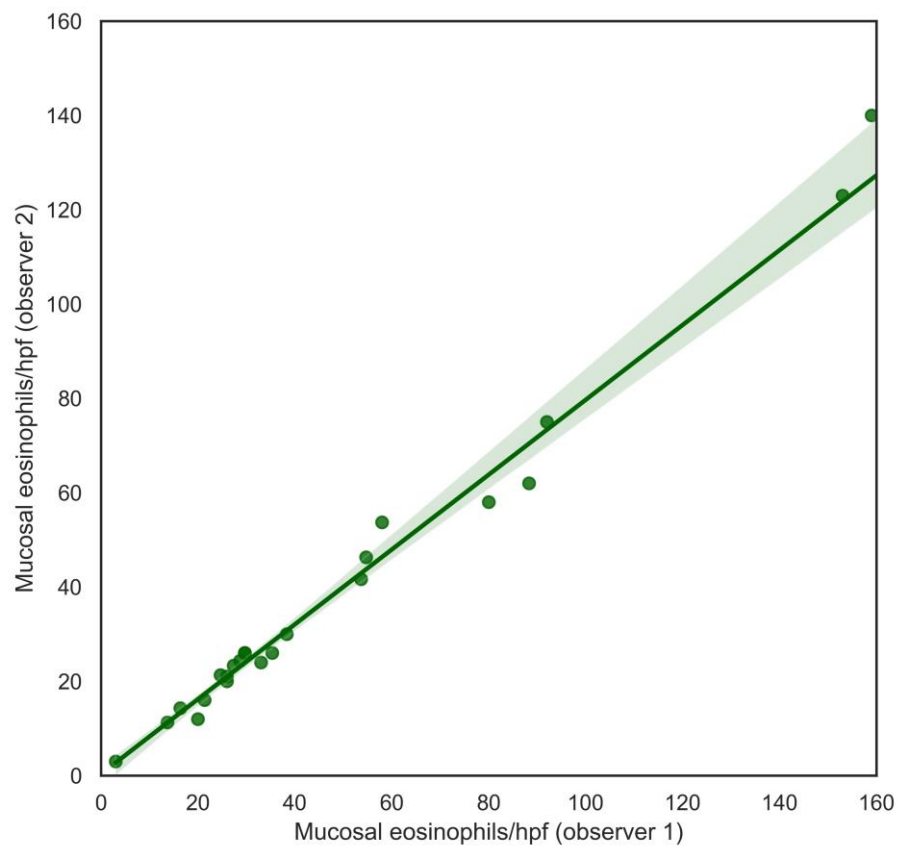

**Supplementary Figure S2.** Inter-observer agreement on the abundance of mucosal eosinophils in pre-treatment intestinal biopsies from non-inflamed regions in the colon ascendens.

### Supplementary Figure S3

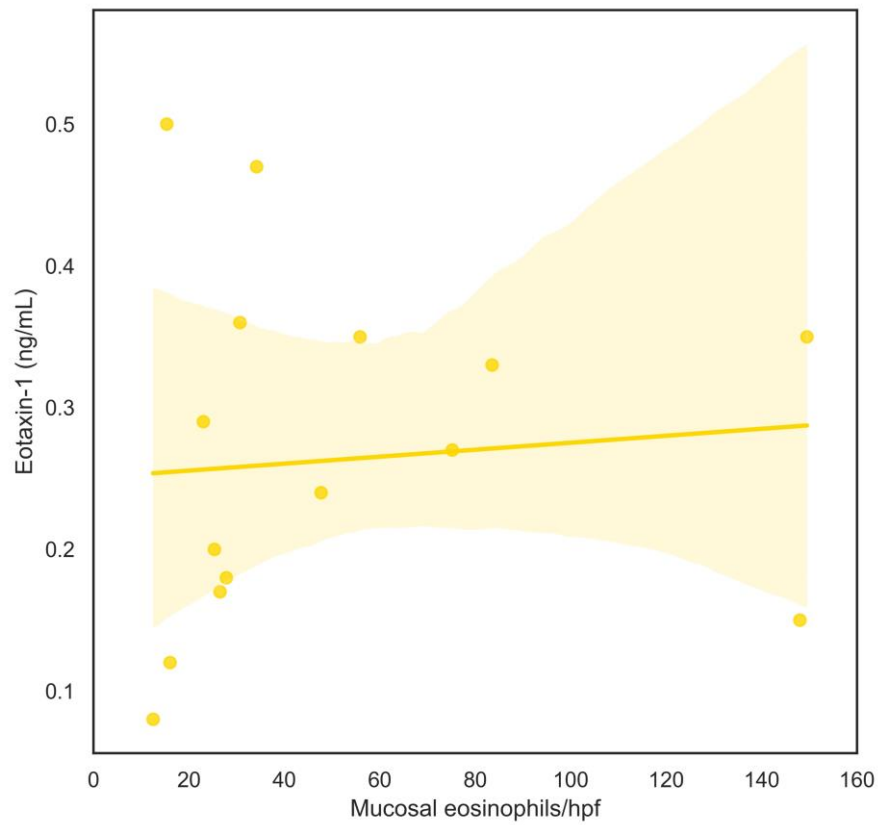

**Supplementary Figure S3.** Mucosal eosinophil abundance was not associated to serum eotaxin-1 levels in patients with IBD.

### Supplementary Figure S4

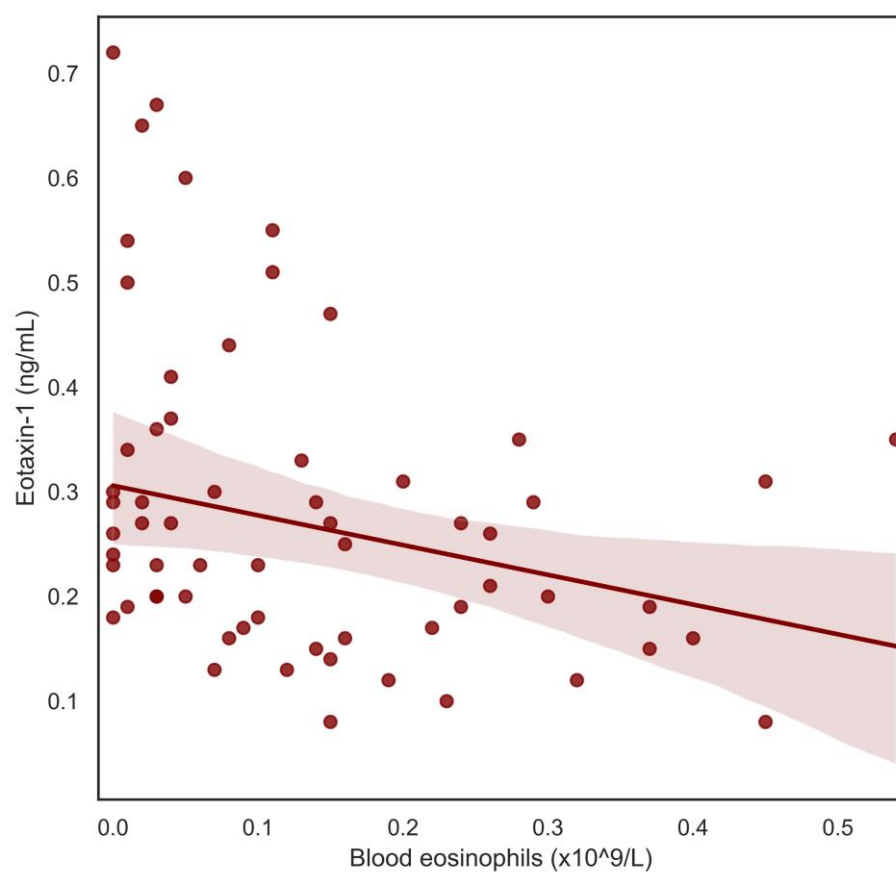

**Supplementary Figure S4.** Blood eosinophil concentrations (x10<sup>9</sup>/L) were significantly inversely associated with serum eotaxin-1 levels (ng/mL).
